# Supplementary material
Source: PubMed Central journal article supplement (PMC3037643)
Supplement: supp_M110.202382_jbc.M110.202382-1.pdf [file supp_M110.202382_jbc.M110.202382-1.pdf]

**POSTTRANSLATIONAL MODIFICATIONS OF THE  $\gamma$ -SUBUNIT AFFECT  
INTRACELLULAR TRAFFICKING AND COMPLEX ASSEMBLY OF THE GLcNAC-1-  
PHOSPHOTRANSFERASE**

Marisa Encarnação, Katrin Kollmann, Maria Trusch, Thomas Braulke, and Sandra Pohl

**Supplemental Figures and Table**

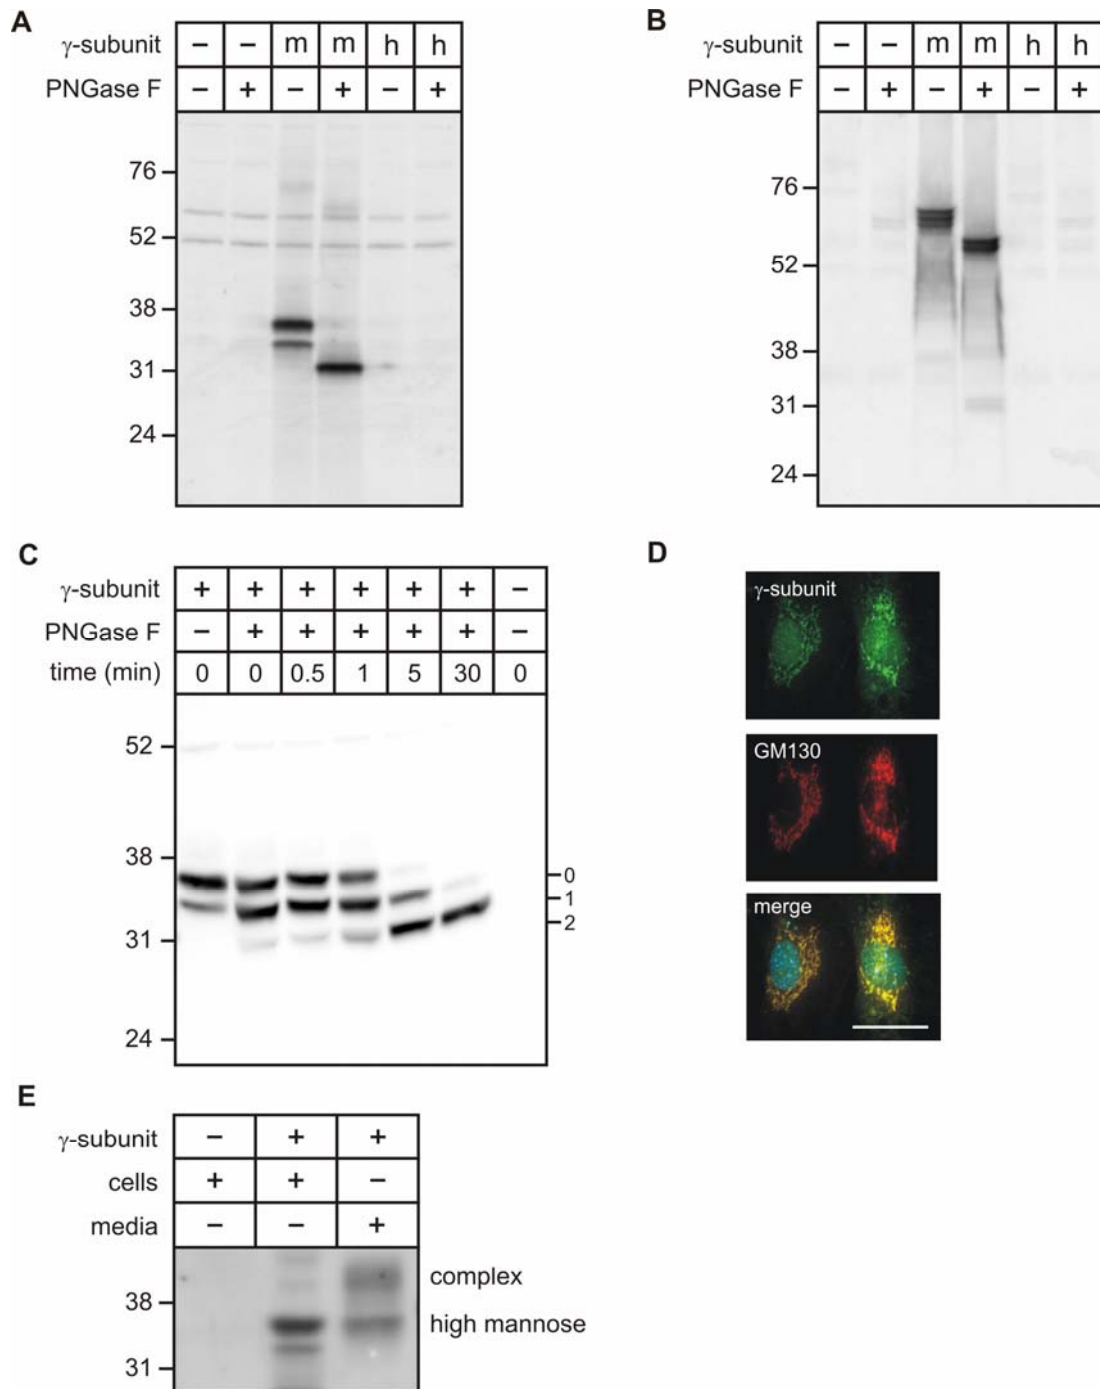

SUPPLEMENTAL FIGURE S1. Expression analysis of mouse  $\gamma$ -subunits. Cell extracts (75  $\mu$ g) from mouse (m) and human (h)  $\gamma$ -subunit overexpressing COS7 cells were analyzed by SDS-PAGE under reducing (A) and non-reducing (B) conditions and western blot analysis using anti mouse  $\gamma$ -subunit antibodies (dilution 1:250). Non-transfected COS7 cells were used as negative control. Cell extracts

(50  $\mu$ g) from mouse  $\gamma$ -subunit overexpressing COS7 cells were incubated for different time points in the presence (+) or absence (-) of PNGase F followed by SDS-PAGE under reducing conditions and western blot analysis using anti mouse  $\gamma$ -subunit antibodies (C). Cultured MEFs were fixed and stained with antibodies against mouse  $\gamma$ -subunit (dilution 1:100) and the *cis*-Golgi marker protein GM130 (red, dilution 1:200). Merged images indicate co-localization (yellow). Nuclei were visualized with DAPI (blue) (D). Cell extracts and conditioned media from COS7 cells overexpressing the mouse  $\gamma$ -subunit were analyzed by SDS-PAGE under reducing conditions followed by western blot analysis against mouse  $\gamma$ -subunit (E). The positions of the molecular mass marker proteins in kDa are indicated.

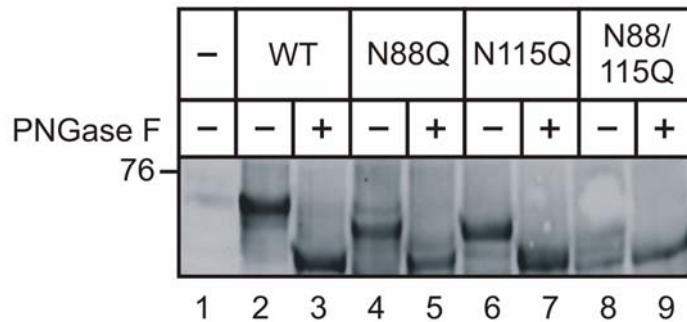

SUPPLEMENTAL FIGURE S2. Dimerization of glycosylation-defective  $\gamma$ -subunits Cell extracts (75  $\mu$ g) from COS7 cells overexpressing the wildtype (WT) or mutant (N88Q, N115Q, N88/115Q)  $\gamma$ -subunits were incubated for 1 h in the presence (+) or absence (-) of PNGase F. The proteins were analyzed by SDS-PAGE (10% acrylamide) under non-reducing conditions and human  $\gamma$ -subunit western blot analysis. The position of the molecular mass marker protein is indicated.

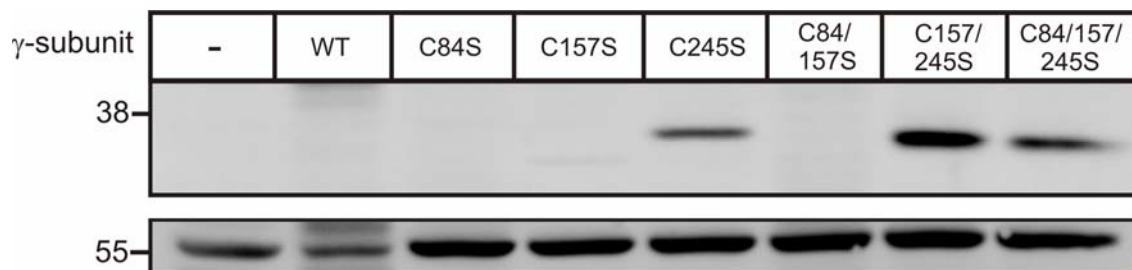

SUPPLEMENTAL FIGURE S3. Dimerization of cysteine mutant  $\gamma$ -subunits. Cell extracts (75  $\mu$ g) from BHK cells overexpressing the wildtype (WT) or mutant (C84S, C157S, C245S, C84/157S, C157/245S, C84/157/245S)  $\gamma$ -subunits were analyzed by SDS-PAGE (10% acrylamide) under reducing conditions and human  $\gamma$ -subunit western blot analysis. A 55 kDa band from the same blot interacting unspecifically with the anti  $\gamma$ -subunit antibody in COS7 cells were presented as loading control. The position of the molecular mass marker protein in kDa is indicated.

|                          |                                                                                                                                                      |     |     |
|--------------------------|------------------------------------------------------------------------------------------------------------------------------------------------------|-----|-----|
|                          | 20                                                                                                                                                   | 40  | 60  |
| <i>Homo sapiens</i>      | MAAGLARLLLLLGLSAGGPAPAGAAMKMKVVEEPNAFGVNPPFLPQASRLQAKRDPSPVSG                                                                                        |     |     |
| <i>Pan troglodytes</i>   | MAAGLARLLLLLGLSARGPAPAGAAMKMKVVEEPNSFGVNNPFLPQASRLQAKRDPSPVSG                                                                                        |     |     |
| <i>Mus musculus</i>      | MAGRLAGFLMLLLGLASQGPAPACAGKMKVVEEPNTFGLNPPFLPQASRLQPKREPSAVSG                                                                                        |     |     |
| <i>Rattus norvegicus</i> | MAGRLTGFLLMLLGLAAQGPAPTHAGKMKVVEEPNTFGLNPPFLPQASRLQPKREPSAVSG                                                                                        |     |     |
| <i>Gallus gallus</i>     | MAA--ARLLLLAVFVGAALGVLSASGKMKIVVEEPNTFGLNPPFLPQTNRLOPKMLPSAISG                                                                                       |     |     |
|                          | 80                                                                                                                                                   | 100 | 120 |
| <i>Homo sapiens</i>      | PVHLFRLSGKCFSLVESTYKYEF <b>CPFHNV</b> TQHEQTFRWNAYS <b>SGIKGIWHEWEI</b> ANNTFTG                                                                      |     |     |
| <i>Pan troglodytes</i>   | PVHLFRLSGKCFSLVESTYKYEF <b>CPFHNV</b> TQHEQTFRWNAYS <b>SGIKGIWHEWEI</b> ANNTFTG                                                                      |     |     |
| <i>Mus musculus</i>      | PLHLFRLAGKCFSLVESTYKYEF <b>CPFHNV</b> TQHEQTFRWNAYS <b>SGIKGIWHEWEI</b> INNTFKG                                                                      |     |     |
| <i>Rattus norvegicus</i> | PPLHLFRLAGKCFSLVESTYKYEF <b>CPFHNV</b> TQHEQTFRWNAYS <b>SGIKGIWHEWEI</b> VNNTFKG                                                                     |     |     |
| <i>Gallus gallus</i>     | PVHLFRLAGKCFSEVESTYKYEF <b>CPFHNV</b> TQHEQTFRWNAYS <b>SGIKGIWHEWEI</b> DNNTFVG                                                                      |     |     |
|                          | 140                                                                                                                                                  | 160 | 180 |
| <i>Homo sapiens</i>      | MWMRDGDACRSRSRQSKVELACGKSNRLAHVSE <b>PSTCV</b> YALTFETPLV <b>CHPHALLVYPTL</b>                                                                        |     |     |
| <i>Pan troglodytes</i>   | MWMRDGDACRSRSRQSKVELACGKSNRLAHVSE <b>PRTCV</b> YALTFETPLV <b>CHPHALLVYPTL</b>                                                                        |     |     |
| <i>Mus musculus</i>      | MWMTDGDSCHRSRSRQSKVELT <b>CGK</b> INRLAHVSE <b>PSTCV</b> YALTFETPLV <b>CHPSALLVYPTL</b>                                                              |     |     |
| <i>Rattus norvegicus</i> | MWMTDGDSCHRSRSRQSKVELT <b>CGK</b> TNRLAHVSE <b>PSTCV</b> YALTFETPLV <b>CHPSALLVYPTL</b>                                                              |     |     |
| <i>Gallus gallus</i>     | MWMREGDS <b>CE</b> TKSRQTKVHLV <b>CGK</b> SNKLA <b>Y</b> VSE <b>PSTCV</b> YSLTFETPLV <b>CHPSALLVYPTL</b>                                             |     |     |
|                          | 200                                                                                                                                                  | 220 | 240 |
| <i>Homo sapiens</i>      | PEALQRWDQVEQDLADELIT <b>POGHEKLLR</b> TLFEDAGY <b>LKTP</b> EENE <b>PTQ</b> LEGGPDS <b>LGFE</b>                                                       |     |     |
| <i>Pan troglodytes</i>   | PEALQRWDQVEQDLADELIT <b>POGHEKLLR</b> TLFEDAGY <b>LKTP</b> EENE <b>PTQ</b> LEGGPDS <b>LGFE</b>                                                       |     |     |
| <i>Mus musculus</i>      | SEALQRWDQVEQDLADELIT <b>POGYEKLLR</b> VLFE <b>DAGY</b> LKVP <b>GETHPTQ</b> LAGGSKGLGLE                                                               |     |     |
| <i>Rattus norvegicus</i> | SEALQRWDQVEQDLADELIT <b>POGYEKLLR</b> ALFE <b>DAGY</b> LKVP <b>GETHPTQ</b> LAGGSKGLGLE                                                               |     |     |
| <i>Gallus gallus</i>     | TEALQRKWD <b>EAEQ</b> SLYD <b>QLITE</b> QGY <b>KKILKEI</b> FEEAGL <b>LKATEEKE</b> -AEKQNM <b>KTSLQFE</b>                                             |     |     |
|                          | 260                                                                                                                                                  | 280 | 300 |
| <i>Homo sapiens</i>      | TLE <b>NC</b> RKAH <b>KEL</b> SKEIKR <b>LKGL</b> L <b>TOHG</b> IPYTRP-TETS <b>NLEHLGH</b> ETPR- <b>AKSPEQLR</b> GD                                   |     |     |
| <i>Pan troglodytes</i>   | TLE <b>NC</b> RKAH <b>KEL</b> SKEIKR <b>LKGL</b> L <b>TOHG</b> IPYTRP-TETS <b>NLEHLGH</b> KTPR- <b>AKSPEQLR</b> GD                                   |     |     |
| <i>Mus musculus</i>      | TLD <b>NC</b> RKAH <b>AEL</b> SQ <b>EVKRL</b> KS <b>LLEOHG</b> IPHT <b>Q</b> P-TET <b>HSQHLGH</b> K <b>TP</b> IG <b>AI</b> A <b>EH</b> LRSD          |     |     |
| <i>Rattus norvegicus</i> | TLD <b>IC</b> RKAH <b>AEL</b> S <b>REVKRL</b> KS <b>LLEOHG</b> IPHT <b>Q</b> P-TET <b>HSQHLGH</b> K <b>TP</b> VGE <b>IS</b> -EQLR <b>GD</b>          |     |     |
| <i>Gallus gallus</i>     | TV <b>DKCR</b> KEY <b>KKLSE</b> ET <b>KLK</b> DL <b>LNQ</b> HN <b>TAYQR</b> SSA <b>ENTSV</b> EH <b>VN</b> HK <b>WATA</b> ETT <b>V</b> LN <b>GSTN</b> |     |     |
|                          | 309                                                                                                                                                  |     |     |
| <i>Homo sapiens</i>      | PGLRGS-I--                                                                                                                                           |     |     |
| <i>Pan troglodytes</i>   | PGLRGS-I--                                                                                                                                           |     |     |
| <i>Mus musculus</i>      | PGLRCNII--                                                                                                                                           |     |     |
| <i>Rattus norvegicus</i> | PGLRCNII--                                                                                                                                           |     |     |
| <i>Gallus gallus</i>     | AERLHG <b>DAGI</b>                                                                                                                                   |     |     |

SUPPLEMENTAL FIGURE S4. Sequence alignment of  $\gamma$ -subunit orthologues. Identical amino acids are shown in yellow. Conserved *N*-glycosylation consensus sequences and cysteine residues are marked in red.

**SUPPLEMENTAL TABLE 1: Sequences of primers used in this study**

| Primer              | 5'-3' Sequence                                                        |
|---------------------|-----------------------------------------------------------------------|
| hy-HindIII-for      | GTACA <u>AAGCTT</u> GCAATGGCGGGCGGGGCTGGCGCGG                         |
| hy-NotI-rev         | GTAGCGGCCGCTCACAAACTCCCACGCAGTCC                                      |
| hy-RGSHis6-NotI-rev | GTAGCGGCCGCTTAGTGATGGTGATGGTGATGCGATCCTCTTCCCA<br>AACTCCCACGCAGTCCTGG |
| my-HindIII-for      | GTACA <u>AAGCTT</u> GACCCTAGGAGCAATGGCGG                              |
| my-NotI-rev         | GTAGCGGCCGCTCACAGGATGTTCCCACGTAG                                      |
| my-RGSHis6-NotI-rev | GTAGCGGCCGCTTAGTGATGGTGATGGTGATGCGATCCTCTTC                           |
| my-NcoI pET-for     | GTACA <u>AAGCTT</u> GACCCTAGGAGCAATGGCGG                              |
| hy-N88Q-for         | TTCTGCCC GTTCCACCAAGTGACCCAGCACGA                                     |
| hy-N88Q-rev         | TCGTGCTGGGTCACTTGGTGGAACGGGCAG                                        |
| hy-N115Q-for        | TGGGAGATCGCCCAAACACCTTCAC                                             |
| hy-N115Q-rev        | GTGAAGGTGTTTTGGGCGATCTCCCA                                            |
| hy-C142S-for        | GTGGAGCTGGCGTCTGGAAAAAGCAAC                                           |
| hy-C142S-rev        | GTTGCTTTTTCCAGACGCCAGCTCCAC                                           |
| hy-C157S-for        | GAGCCGAGCACCTCCGTCTACGCGCTG                                           |
| hy-C157S-rev        | CAGCGCGTAGACGGAGGTGCTCGGCTC                                           |
| hy-C169S-for        | ACCCCCCTCGTCTCCCACCCCCACGCC                                           |
| hy-C169S-rev        | GGCGTGGGGGTGGGAGACGAGGGGGGT                                           |
| hy-C245S-for        | ACCCTGGAAA ACTCCAGGAAGGCTCAT                                          |
| hy-C245S-rev        | ATGAGCCTTCCTGGAGTTTTCCAGGGT                                           |

hy: human  $\gamma$ -subunit; my: mouse  $\gamma$ -subunit

The restriction sites are indicated by underlined nucleotides.

Substituted amino acid is introduced by bold nucleotides.
